# Supplementary material for: Influence of acute combined physical and cognitive exercise on cognitive function: an NIRS study
Source: PeerJ. 2019 Aug 2;7:e7418. doi: 10.7717/peerj.7418 (PMC6681798; doi:10.7717/peerj.7418)
Supplement: Dataset S1 — Raw data of Sheet 1 applied for data analyses and preparation for Table 1, raw data of Sheet rt applied for data analyses and preparation for Fig. 3, raw data of Sheet Oxy applied for data analyses and preparation for Fig. 4. [file peerj-07-7418-s001.xlsx]

## Sheet: Sheet1
age	weight	hight	BMI	MMSN	Education	M/F	VO2peak	IPAQ MET
67	63	164	23.4236	27	11	0	27.58	2093.6
64	56	153	23.9224	27	9	0	27.93	1777.5
68	56	153	23.9224	27	9	0	25.59	2124
65	56	153	23.9224	27	9	0	24.19	1662
68	48	158	19.2277	28	11	0	24.06	2062.6
65	65	166	23.5883	28	10	0	29.46	3084
65	51	154	21.5045	29	11	0	23.46	3181.8
67	50	162	19.052	29	9	0	28.82	1977.5
65	61	160	23.8281	28	13	0	26.32	2262
65	66	163	24.841	27	13	0	26.8	2761.8
65	55	163	20.7008	28	13	0	27.32	2493.6
63	60	159	23.7332	28	11	1	25.15	1762
64	61	160	23.8281	29	11	1	24.07	2742.6
65	55	163	20.7008	28	11	1	24.86	2747.7
67	55	163	20.7008	28	11	1	24.72	3001.8
66	66	164	24.539	28	13	1	26.22	2598.4
66	60	164	22.3081	28	13	1	26.47	2493.6
67	70	171	23.939	28	11	1	26.48	2604
65	70	173	23.3887	28	13	1	29.47	2678.4
65	63	169	22.0581	28	13	1	21	1577.5

## Sheet: rt
	beforenaming.RT	afternaming.RT		beforeexecutive.RT	afterexecutive.RT
C	564.158	564.23		1008.93	1026.27
C	604.526	632.435		1040.71	1080.02
C	559.722	543.452		1052.06	972.373
C	652.95	654.675		1119.24	1070.94
C	553.45	587.453		1071.8	1031.19
C	519.475	504.887		1078.06	1030
C	564.706	523.342		1011.42	980.436
C	551.824	553.453		1027.75	1100.3
C	574.75	574.341		1041.13	1064.35
C	647.222	665.868		1121.4	1077.42
C	556.5	521.323		1063.69	1017.15
C	551.667	564.563		1064.71	1032.97
C	639.222	625.342		1228.67	1189.61
C	569.737	512.786		1016.56	1034.81
C	588.15	531.326		1128.57	1086.82
C	564.438	554.354		1012.54	1172.66
C	564.118	552.746		1024.85	1178.74
C	578.5	542.345		1206	1166.96
C	624.9	676.564		1319.44	1281.42
C	569.889	565.958		1130.36	1090.58
SC	564.32	551.737		1012.4	1084.94
SC	653.454	583.474		1028.58	949.679
SC	565.53	555.842		1036.12	932.53
SC	624.764	648.053		1109.58	1046.79
SC	555.325	535.944		1063.68	1010.89
SC	512.563	513.55		1068.45	1105.97
SC	565.325	545.882		1005.22	964.945
SC	541.345	527.588		1026.26	1116.57
SC	596.624	563.647		1025.78	925.962
SC	615.865	624.706		1112.6	1155.43
SC	513.345	536.562		1054.38	1193.87
SC	565.756	542.5		1058.37	1017.1
SC	601.343	618.2		1220.86	1270.09
SC	587.346	559.7		1100.21	1193.94
SC	576.62	569.158		1020.22	1065.94
SC	523.786	550		1204.56	1152.72
SC	554.343	558.444		1015.62	955.68
SC	575.453	550.867		1198.19	1147.44
SC	603.42	603.632		1311.83	1262.42
SC	565.653	589.941		1122.4	1170.69
SE	569.881	564.158		908.929	998.929
SE	615.035	591.474		940.714	935
SE	568.223	567.263		1052.06	961.706
SE	645.387	648.789		1119.24	1095.5
SE	559.922	549.5		1071.8	1000.83
SE	521.214	539.579		1078.06	944.786
SE	570.662	565		911.417	902.5
SE	552.103	550.588		927.75	823.333
SE	591.434	570.294		1041.13	856.8
SE	538.016	563.471		1121.4	1089.5
SE	540.488	512.889		1063.69	1000.5
SE	564.228	530.294		1064.71	932.5
SE	606.675	608.2		1228.67	1150.56
SE	584.239	567.95		1116.56	964.294
SE	588.266	570.05		1128.57	1086.88
SE	549.756	543.722		1212.54	1215.71
SE	564.871	547.722		1024.85	945.2
SE	582.761	567.556		1206	1063.29
SE	600.409	619.526		1319.44	1238.5
SE	573.47	559.882		1130.36	1029
CE	576.579	569		1008.93	943.615
CE	614.68	564.833		940.714	833
CE	542.493	525.263		1052.06	906.583
CE	630.422	607.895		1119.24	949.4
CE	531.936	510.421		1071.8	1027.07
CE	532.753	486.105		1078.06	910
CE	545.797	526.889		1011.42	941.636
CE	521.162	490.5		1027.75	1021.83
CE	560.169	525.588		1041.13	963
CE	607.229	567.235		1121.4	941.231
CE	553.456	510.412		1063.69	977.538
CE	559.892	508.118		1064.71	1007.31
CE	638.98	618.737		1228.67	1068.4
CE	563.535	557.333		1116.56	1011.94
CE	591.654	575.158		1128.57	1016.57
CE	557.807	547.176		1212.54	1145.25
CE	588.371	552.625		1024.85	955.5
CE	586.809	555.118		1206	1105.67
CE	632.687	600.474		1319.44	1237.61
CE	563.533	557.176		1130.36	1039.56

## Sheet: Oxy
	oxynamin	l-DLPFC	l-VLPFC	r-VLPFC	r-DLPFC		executive	l-DLPFC	l-VLPFC	r-VLPFC	r-DLPFC
C		0.000176899	0.000388068	0.000141095	8.02836e-05			0.000221088	0.00562361	0.000125537	0.000461833
C		6.70079e-05	7.85644e-05	1.46719e-05	6.27981e-05			0.000888724	0.000230445	0.000199121	0.000100713
C		0.000291986	8.13222e-05	0.000389091	0.0011937			0.000144644	0.000545606	0.000272912	0.0001469
C		0.000442854	8.27891e-05	6.74613e-05	0.000129875			0.000796076	0.000690234	0.000428804	0.000854577
C		0.000452025	0.000108081	4.21032e-05	0.000915449			0.000214228	0.000205495	2.80741e-05	4.70209e-05
C		1.37986e-05	0.00020626	0.000626073	6.77176e-05			0.0012235	0.000354429	0.0018501	0.000100683
C		0.000413768	0.00010332	0.000866349	1.19403e-05			0.000116129	4.12746e-05	2.79424e-05	0.000103303
C		0.000127963	0.000605099	0.000296896	0.000117509			0.000402641	0.000640953	0.000383034	3.62701e-06
C		0.000341688	7.87506e-05	0.000289715	0.000289307			0.000178452	0.000260963	4.33325e-05	0.000326802
C		0.000165864	0.000358438	0.000706977	0.00194167			4.0405e-05	1.31005e-05	4.76948e-05	0.000789158
C		0.000202865	0.000220489	0.000149546	0.000122776			0.000375789	0.000288988	0.000189125	0.000347438
C		3.74745e-05	8.19442e-05	8.76387e-05	5.60068e-05			0.000816743	0.000498842	0.000111469	3.78514e-05
C		0.000186571	9.00367e-05	0.00043	0.00109384			0.000273558	0.000545174	0.000481798	0.000359053
C		0.00113157	0.000123988	0.000689082	0.000167876			0.00010232	7.05444e-05	0.000406122	0.000785755
C		0.000473647	0.000380502	0.000108581	0.00141476			7.3446e-05	9.23191e-05	0.000390099	0.00104453
C		9.20902e-05	2.94064e-05	4.56372e-05	2.72079e-05			0.00014806	0.000466573	0.00202727	0.00109085
C		0.000454897	0.00010148	9.83858e-05	2.7567e-05			3.8019e-05	8.87366e-05	1.89954e-05	0.000151172
C		0.000179047	1.03748e-05	0.000124481	0.00029472			0.000152804	0.000749009	3.05398e-05	0.000452893
C		0.000106275	0.000844263	0.000229083	4.82488e-05			0.000291677	0.000700178	4.98098e-05	4.20069e-05
C		0.00018002	0.000176556	0.000575943	0.00184451			0.000276094	2.11826e-05	6.44767e-06	0.000711046
SC		6.46788e-05	0.0012423	0.00127273	0.000580234			0.000979157	0.00225009	0.00016578	0.000584805
SC		0.000795548	7.50365e-05	0.000352131	0.000199448			0.0013802	0.000107771	6.0045e-06	0.000153247
SC		0.000260791	0.000101117	0.00253878	0.00255933			0.000559944	0.000306022	0.00049968	0.000210907
SC		0.000271673	1.4215e-05	0.000299508	0.000110944			0.000420959	0.000577174	0.000228085	0.000494764
SC		0.000245189	0.000329035	0.000362991	8.31344e-05			0.000307898	0.00035733	5.35619e-05	0.00063911
SC		0.000169095	0.000748432	9.45993e-05	0.000362847			0.00193898	6.47741e-05	0.00212584	0.00155365
SC		0.000512075	0.00191423	0.000991825	0.000261225			0.00024496	0.000257845	0.000164759	7.8381e-06
SC		8.13234e-05	0.000161106	0.000385723	0.000291888			1.63303e-05	0.000151662	2.99808e-05	0.000323128
SC		5.92001e-05	0.000536232	0.000294416	4.62172e-05			0.000201919	0.000390771	0.000318936	0.000496734
SC		0.000505563	0.00079077	0.000452978	0.00364716			0.00247304	0.000172411	0.00075833	0.000611084
SC		0.000129418	0.000181149	0.00140129	0.00061757			0.00143866	0.00357809	0.000237023	0.000503403
SC		0.000128973	5.46044e-05	0.000463081	0.00038159			0.00161594	0.000168565	0.000212592	0.000158091
SC		0.000833268	0.000105086	0.000314549	0.00270549			3.75619e-05	0.000246972	0.000709452	0.000302173
SC		0.000129357	0.000347894	0.00107759	0.00020116			0.00131576	0.000496656	0.000448384	0.000504377
SC		0.000209706	0.000238455	0.000465219	0.00058845			0.00025342	0.000378369	0.000100173	0.000632353
SC		8.24262e-05	0.00013467	0.00033208	2.30199e-05			0.00186305	0.00053361	0.0021607	0.0015872
SC		0.000601738	0.00168042	0.000112129	0.000121089			0.000234975	0.000712344	4.09792e-06	0.000248526
SC		0.000235217	0.00125997	0.000208568	0.000356129			0.000364209	0.000615199	0.000518124	0.000559888
SC		4.44492e-05	0.000272663	0.000215458	0.000244403			0.000167227	0.00161574	0.000465645	0.000443848
SC		0.000570633	0.000359488	0.000321825	0.000318662			0.00027122	0.000189354	0.000860679	0.000651514
SE		9.926e-05	0.000275798	0.000129017	6.68733e-05			0.000239292	0.00542384	0.000172074	0.00794394
SE		0.000712359	0.000271199	6.2266e-05	5.09995e-05			4.90465e-05	0.000991025	0.000605639	0.000267378
SE		0.000288824	0.000123741	0.000117926	0.00205711			0.000175876	0.00217996	0.000490295	0.000999193
SE		0.000145398	5.098e-05	0.000543977	0.000350637			0.00115256	0.00078805	0.000691505	0.00127399
SE		0.0001907	1.62608e-06	0.00134449	0.000321002			0.000511243	0.000238401	8.12462e-05	1.93044e-05
SE		6.95319e-05	0.000176062	0.00200396	0.000336354			0.000964504	2.40878e-05	0.00212186	0.000782803
SE		0.000750529	0.000763965	0.00140268	0.000154809			0.000961159	4.3264e-05	5.37832e-05	0.000520927
SE		0.000489465	0.00258662	0.000714939	0.000124524			0.000331911	0.000111494	0.000311446	0.000232071
SE		9.76424e-06	1.67888e-05	0.000491148	0.000380414			0.00119945	5.2234e-05	0.00190609	0.000286003
SE		0.000221412	0.000646777	0.00129534	0.000440407			0.00765966	0.00102254	0.00112999	0.00190688
SE		8.37422e-05	0.00151376	0.00137586	0.000724476			0.000149609	0.000530737	0.000242068	0.00253378
SE		0.00264002	0.000349613	0.000393511	5.22575e-05			0.00132621	0.00143741	0.000495597	0.000238238
SE		0.000112666	0.00015449	0.0011522	0.00149506			0.000316184	0.000256071	0.00084786	0.000682845
SE		0.000105088	0.000482529	0.000691515	0.00045991			0.00104442	0.000101361	0.00564228	0.00119894
SE		0.000239324	0.000108707	0.00177418	0.00518397			0.000411559	6.65423e-05	0.000107462	0.00147148
SE		9.289e-05	9.16307e-06	0.00162725	0.00016569			0.00201462	0.000107985	0.00254697	0.000979708
SE		0.000794896	0.000801599	0.000160744	0.00015222			0.00107611	0.000108495	0.000338636	0.000290703
SE		1.75723e-05	1.46136e-05	0.000619504	0.000457556			0.00143166	0.000113268	0.00211299	0.000402312
SE		0.000633815	0.00308299	0.00102342	0.000735451			0.000441699	0.000129715	0.000195592	0.000338954
SE		0.000309416	0.000577721	0.0001252	0.00044387			0.00863414	8.70126e-05	0.00132777	0.00226046
CE		0.00131796	0.000771872	0.0033333	0.000529244			0.000268036	0.00304918	0.00080974	0.00179327
CE		0.000383776	0.000129334	0.000296422	9.55198e-05			0.00139409	0.0003397	0.000115474	1.30492e-05
CE		7.32439e-05	0.00097399	0.00226648	0.000832372			0.000546075	0.000112555	0.000201038	0.000860119
CE		0.000104375	0.000236817	0.000249633	0.000214575			0.00135975	0.000130096	0.000853545	0.00125926
CE		0.000718866	0.00113695	0.000195271	0.00182817			0.000112437	0.00015711	0.000504644	0.00246363
CE		0.000152119	0.000458612	0.000867473	3.21266e-05			0.00253617	0.00157032	0.00342746	0.00204242
CE		0.000262592	0.000124481	0.00084798	7.06701e-05			0.00194877	8.17519e-05	0.000206609	0.000248442
CE		7.39251e-05	0.0006787	9.1801e-05	8.66907e-06			0.00132841	0.00062365	0.00126079	2.51374e-05
CE		0.000105882	0.00101544	0.000336227	0.000146742			0.000735185	0.000393526	0.00032497	0.000617593
CE		0.000145788	0.00403583	0.00218748	0.000110301			0.000104462	9.39917e-05	0.000368262	0.000903862
CE		0.00014915	0.000871238	0.00343117	0.00685013			0.000115803	0.00473532	0.000179223	0.00182802
CE		0.00110498	0.000168114	0.000139025	8.00688e-05			0.00146661	0.00104438	0.000321155	0.000559893
CE		0.000721192	0.00106429	0.00279454	0.000527845			0.000717521	2.30729e-05	0.000631155	0.00116318
CE		0.00177103	0.000533842	0.00108319	9.692e-05			0.00129511	0.00104646	0.000161912	0.00142963
CE		0.000702502	0.00136696	0.000339341	0.000214165			0.000457653	0.000186346	0.00131585	0.00464033
CE		0.000102731	0.000149533	0.000995753	8.61666e-05			0.00225645	0.000163961	0.00347983	0.00212551
CE		0.000363289	0.00122092	0.000981238	0.000119821			0.00393654	0.000179844	0.000666181	0.000390183
CE		0.000116699	7.14905e-05	0.00027096	0.000223723			0.000802543	0.00147776	0.000370057	0.000808016
CE		0.000404458	0.000869058	0.00022276	0.000109903			0.00192166	0.00059258	0.00110827	6.79514e-05
CE		0.000111279	0.000857935	0.0017844	0.0001074			0.000812926	0.000109512	0.000752006	0.0017334
